# Supplementary material for: Single-shot condensation of exciton polaritons and the hole burning effect
Source: PubMed Central journal article supplement (PMC6085311; doi:10.1038/s41467-018-05349-4), 2018-08-09
Supplement: 41467_2018_5349_MOESM2_ESM.pdf [file 41467_2018_5349_MOESM2_ESM.pdf]

## **Description of Additional Supplementary Files**

File Name: Supplementary Movie 1

Description: Supplementary Movie shows random shot-to-shot variations of polariton density in real space for each of the images in Supplementary Figure 4.
